# Supplementary material
Source: PubMed Central journal article supplement (PMC4390438)

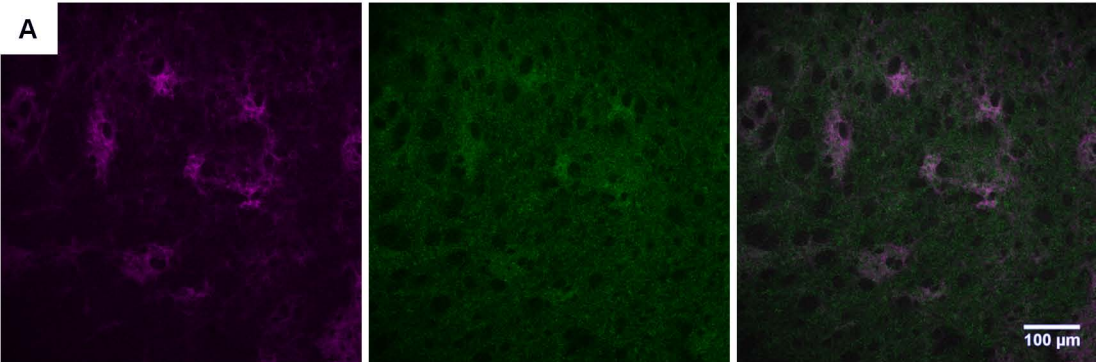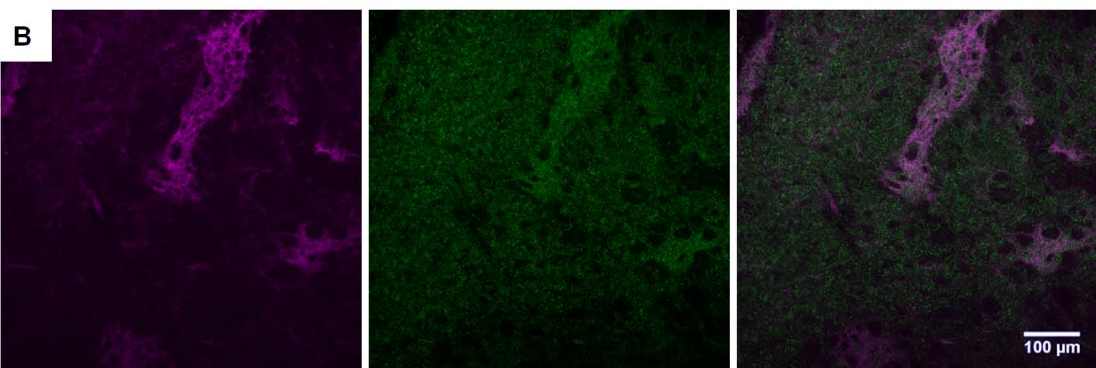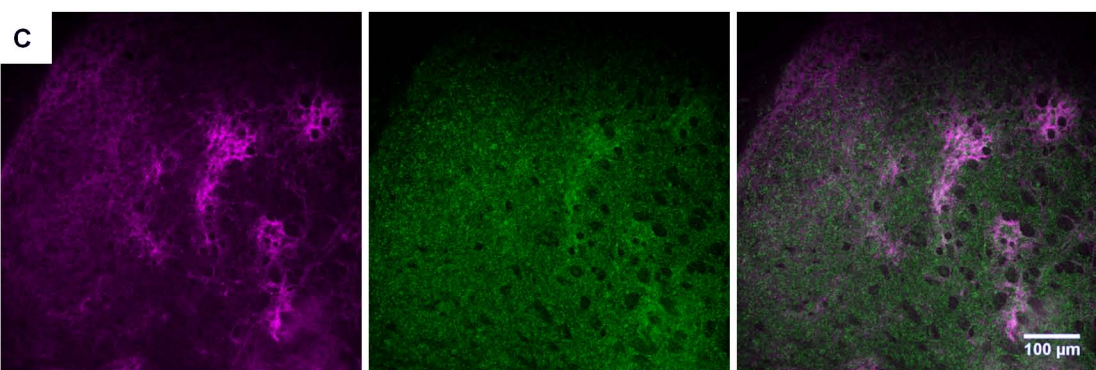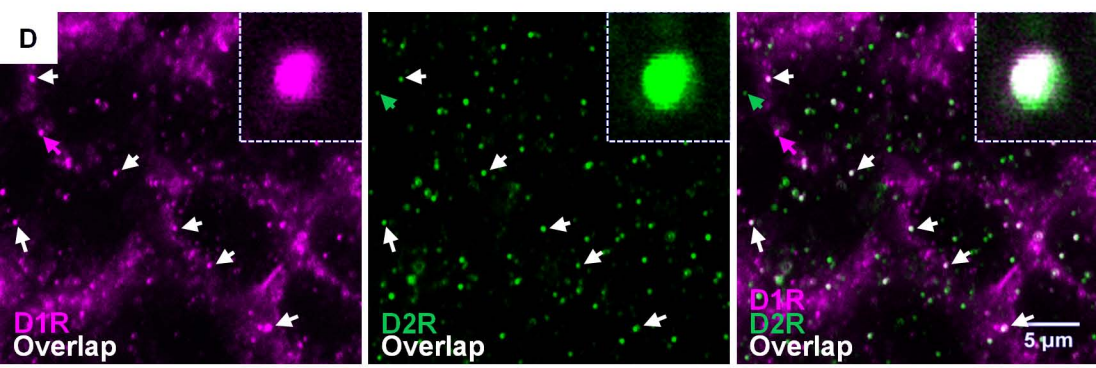

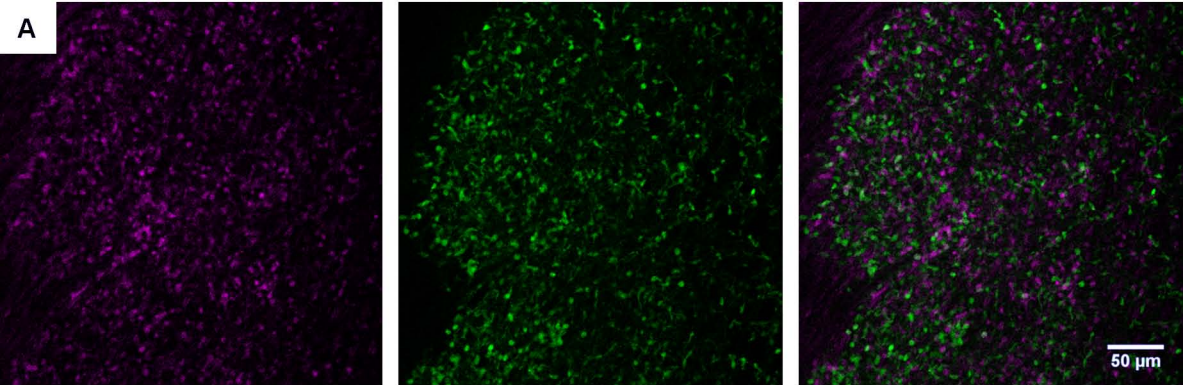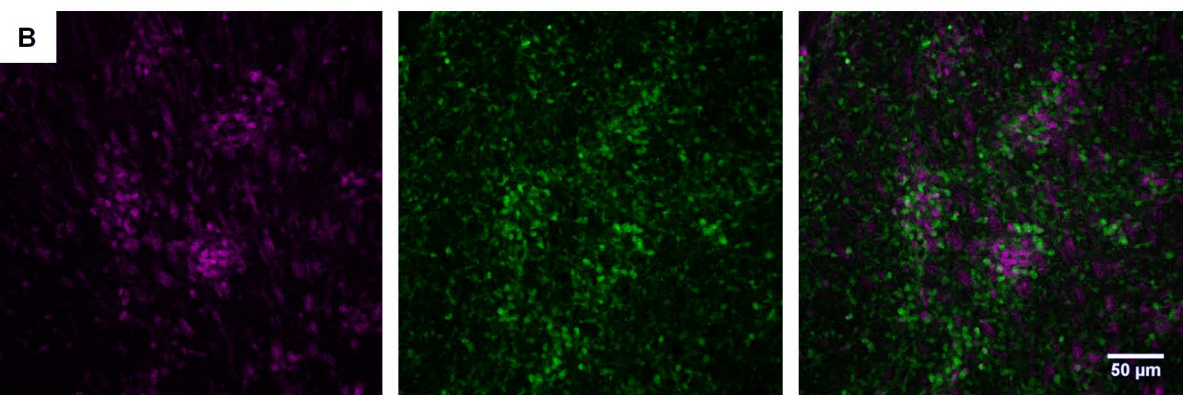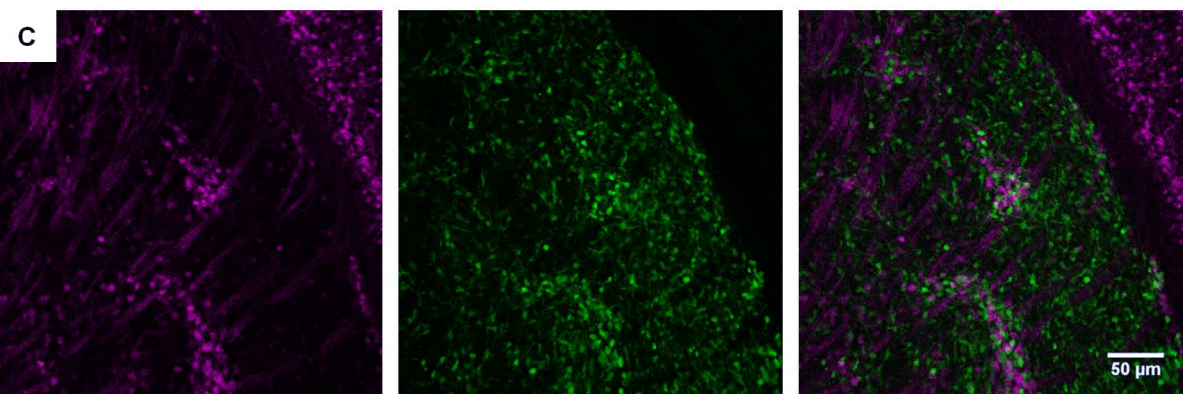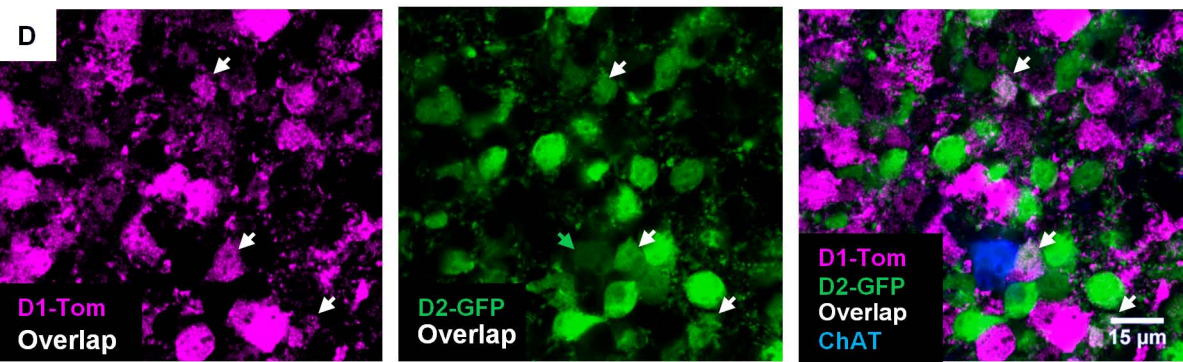

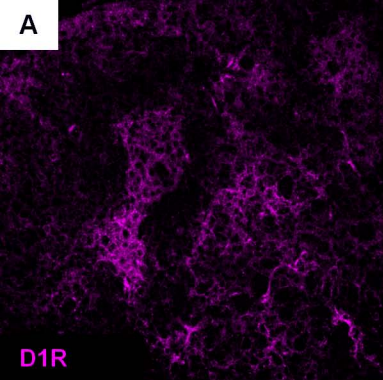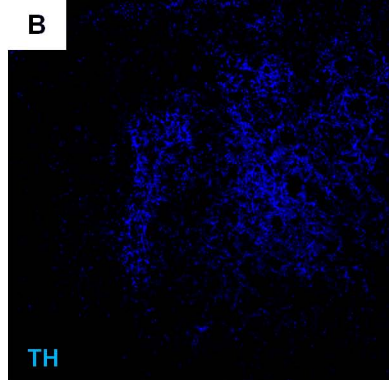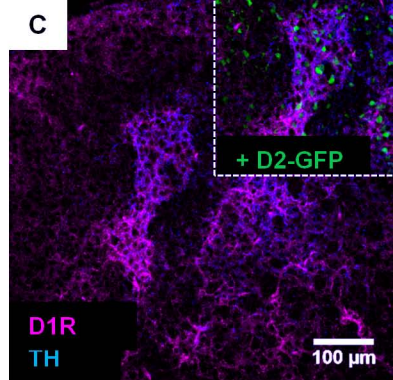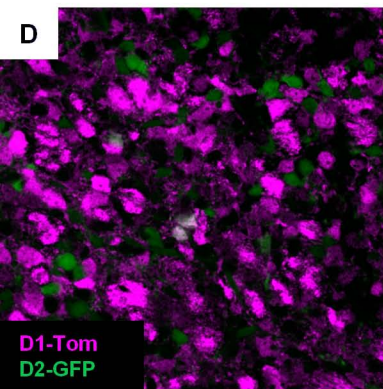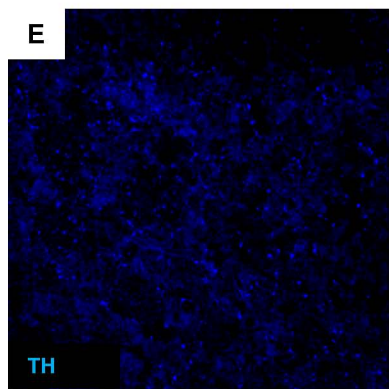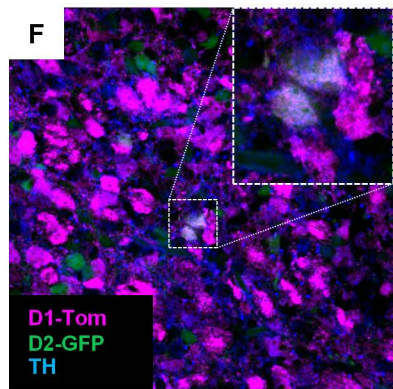

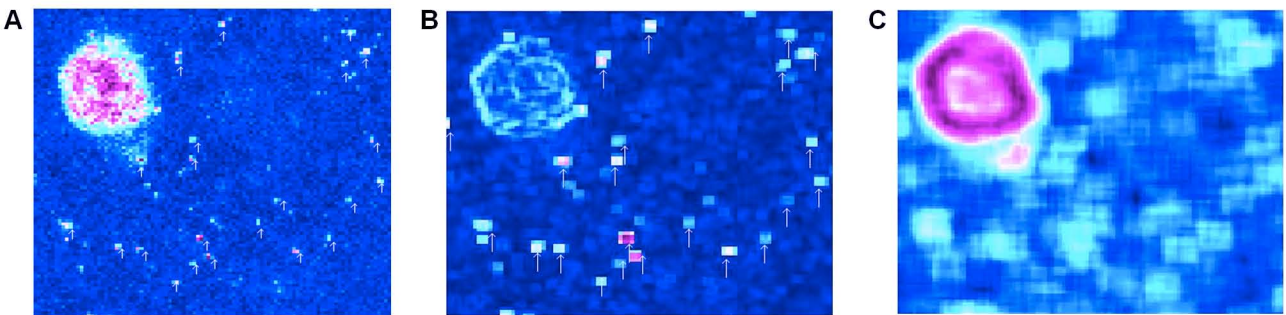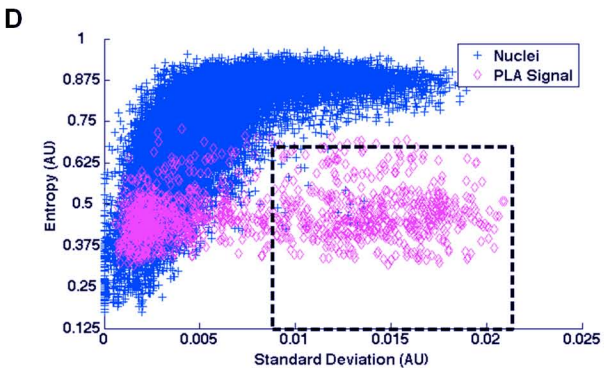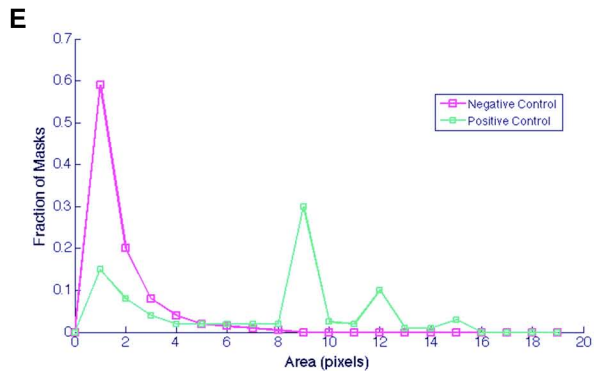

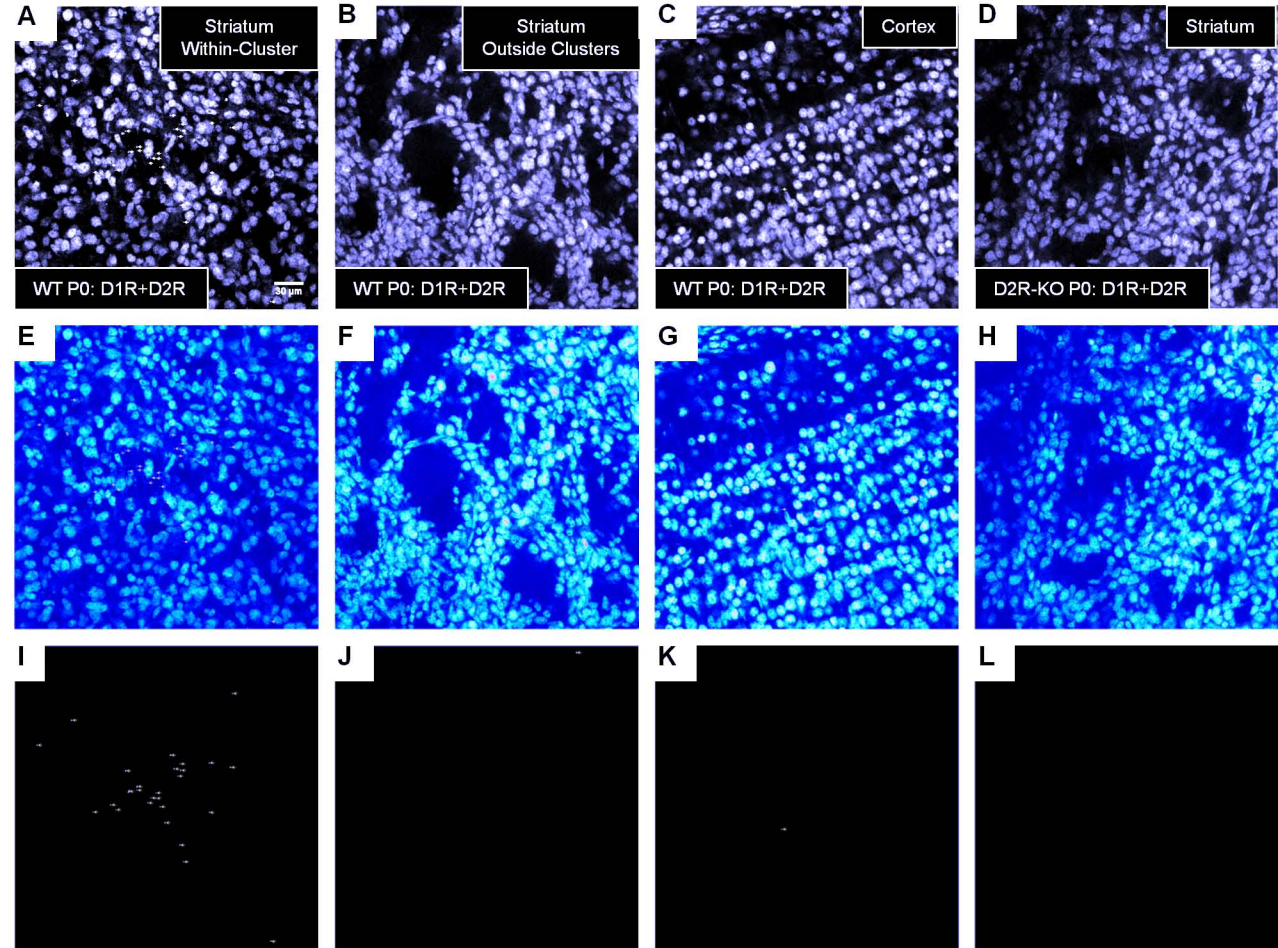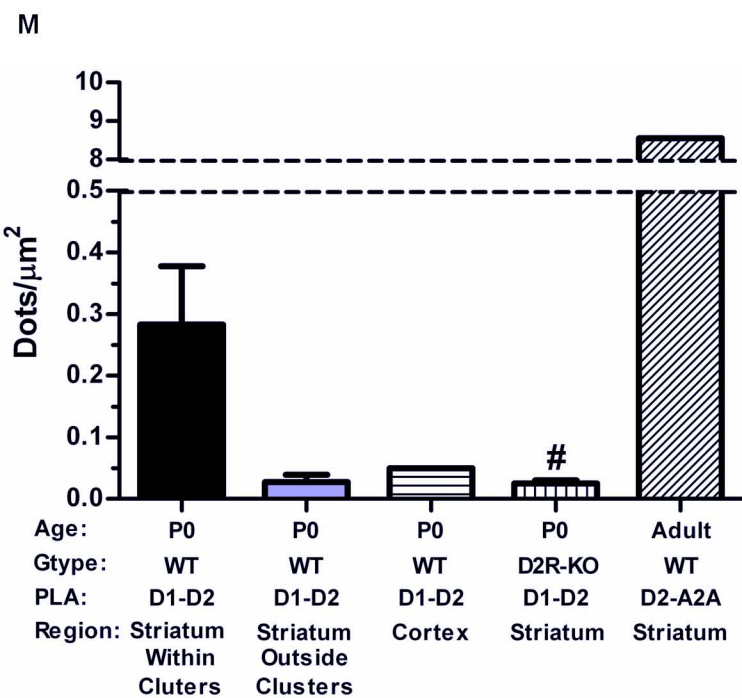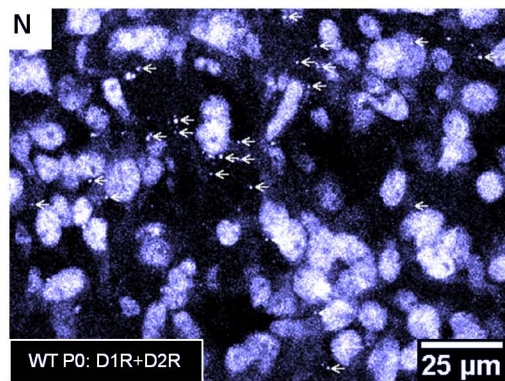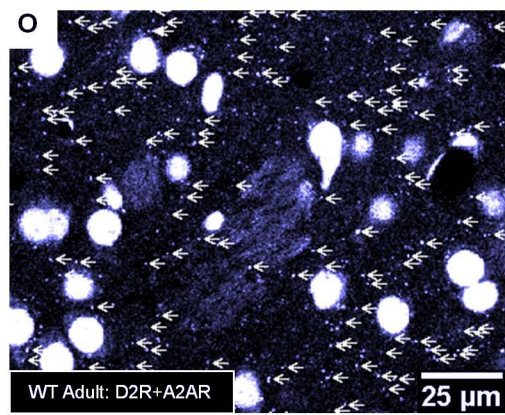

Supplement: NIHMS649637-supplement-Supp_FigureS1-S5.pdf [file NIHMS649637-supplement-Supp_FigureS1-S5.pdf]
